# Supplementary material
Source: publisher figshare collection journal article supplement (https://tandf.figshare.com/ndownloader/files/27896543)
Supplement: Supplementary file 1 [file 27896543]

**Supplementary material**

**A new dimethoxy dihydrochalcone isolated from the shoots of *Empetrum nigrum* L*.***

Anastasiia O. Ponkratovaa, Andrei K. Whaleya, Anastasia A. Orlovaa, Sergey N. Smirnovb, Evgeny B. Serebryakovb, Peter Prokschc, Vladimir G. Luzhanina

a *Saint Petersburg State Chemical Pharmaceutical University, Street Prof. Popova 14, 197376 Saint Petersburg, Russian Federation*

b *Saint Petersburg State University, Universitetskii pr. 26, St. Petersburg, 198504, Russian Federation*

c *Institute of Pharmaceutical Biology and Biotechnology, Heinrich-Heine-Universität Düsseldorf, Universitätsstrasse 1, 40225 Düsseldorf, Germany*

**Abstract**

A new dihydrochalcone, 2',4'-dimethoxydihydrochalcone (**1**), together with 7 known compounds, 2',4'-dihydroxydihydrochalcone (**2**), 2'-hydroxy-4'-methoxydihydrochalcone (**3**), 2'-hydroxy-4'-methoxychalcone (**4**), 1-(3,5-dihydroxy-4-methoxyphenyl)-2-(3-hydroxyphenyl) ethane (**5**), 2,3,4,7-tetramethoxy-9,10-dihydrophenanthrene (**6**), 5-hydroxy-2,3,4-trimethoxy-9,10-dihydrophenanthrene (**7**) and 5,7-dihydroxy-6,8-dimethyl flavanone (**8**) were isolated from the shoots of *Empetrum nigrum*. The structures of these compounds were elucidated using 1D and 2D NMR experiments along with HR-ESI-MS. Compound **6** was isolated from the genus *Empetrum* for the first time.

*Keywords*: *Empetrum nigrum,* black crowberry, dihydrochalcone, bibenzyl, dihydrophenanthrene, flavanone, secondary metabolites.

**Contents Page**

Figure S1. 1H NMR spectrum of compound **1** in DMSO-*d6* (400 MHz) 3

Figure S2: COSY spectrum of compound **1** in DMSO-*d6* (400 MHz) 3

Figure S3. NOESY spectrum of compound **1** in DMSO-*d6* (400 MHz) 4

Figure S4. HMBC spectrum of compound **1** in DMSO-*d6* (400 MHz) 4

Figure S5. HSQC spectrum of compound **1** in DMSO-*d6* (400 MHz) 5

Figure S6. ABX spin system of ring A protons in the 1H NMR spectrum of compound **1**. 5

Figure S7. A2Х2 spin system of *α* and *β* protons in the 1H NMR spectrum of compound **1**. 6

Figure S8. HR-ESI-MS spectrum of compound **1**  6

Figure S9. Key COSY, NOESY and HMBC correlations for **1**. 7

S10. UV, 1H NMR and HR-ESIMS data of compound **2**. 7

S11. UV, 1H NMR and HR-ESIMS data of compound **3**. 7

S12. UV, 1H NMR and HR-ESIMS data of compound **4**. 7

S13. UV, 1H, 13C NMR and HR-ESIMS data of compound **5**. 8

S14. UV, 1H, 13C NMR and HR-ESIMS data of compound **6**. 8

S15. UV, 1H, 13C NMR and HR-ESIMS data of compound **7**. 8

S16. UV, 1H NMR and HR-ESIMS data of compound **8**. 8

S17. Parameters for 1H, COSY, NOESY, HMBC and HSQC experiments. 8

S18. Scan of *Empetrum nigrum* L. voucher specimen 10

Figure S1. 1H NMR spectrum of compound **1** in DMSO-*d6* (400 MHz)


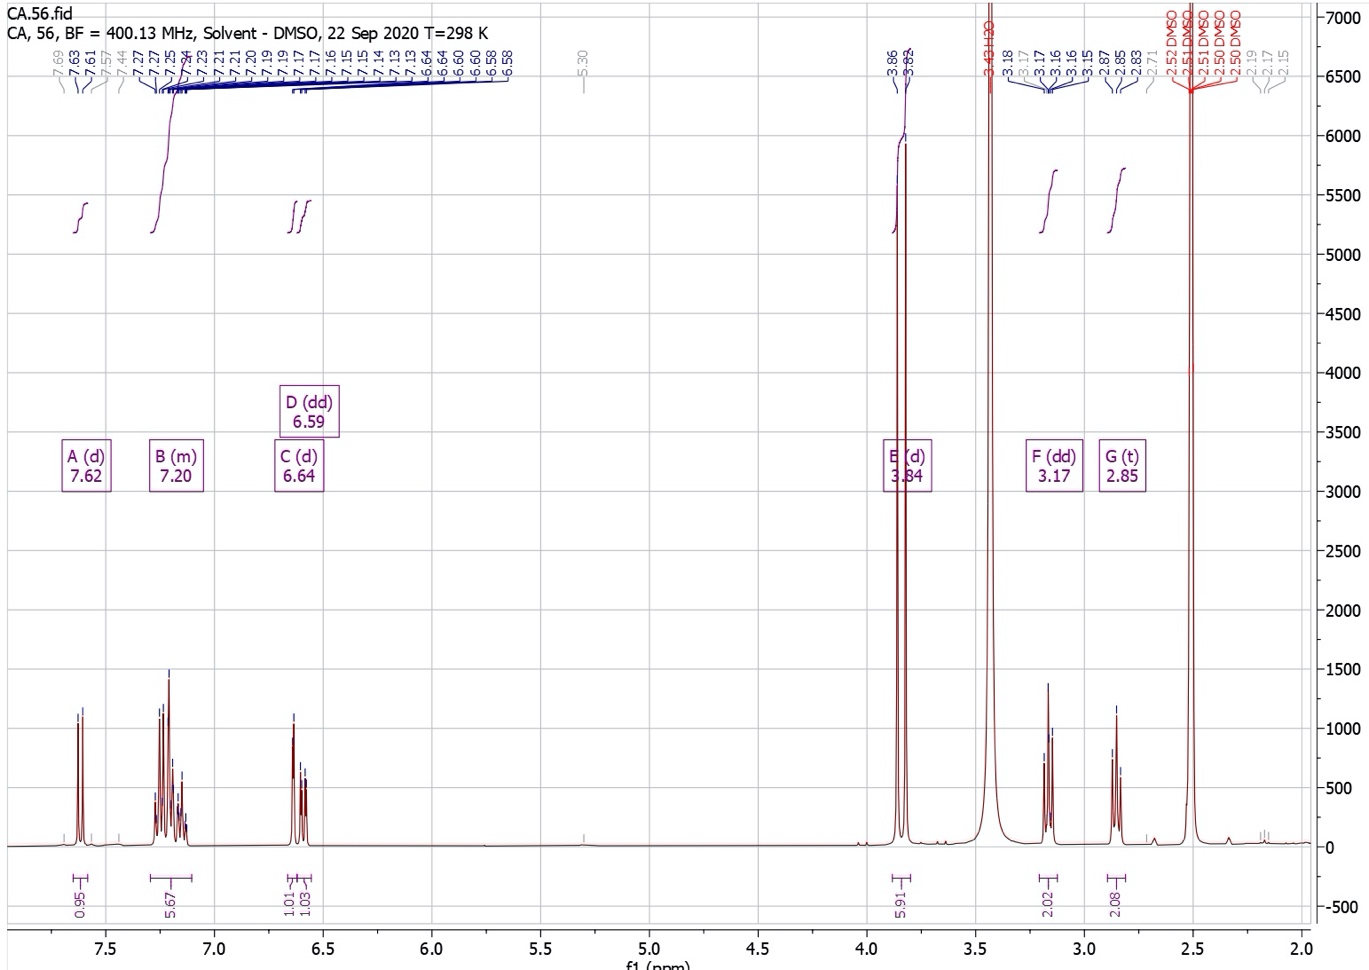


Figure S2: COSY spectrum of compound **1** in DMSO-*d6* (400 MHz)


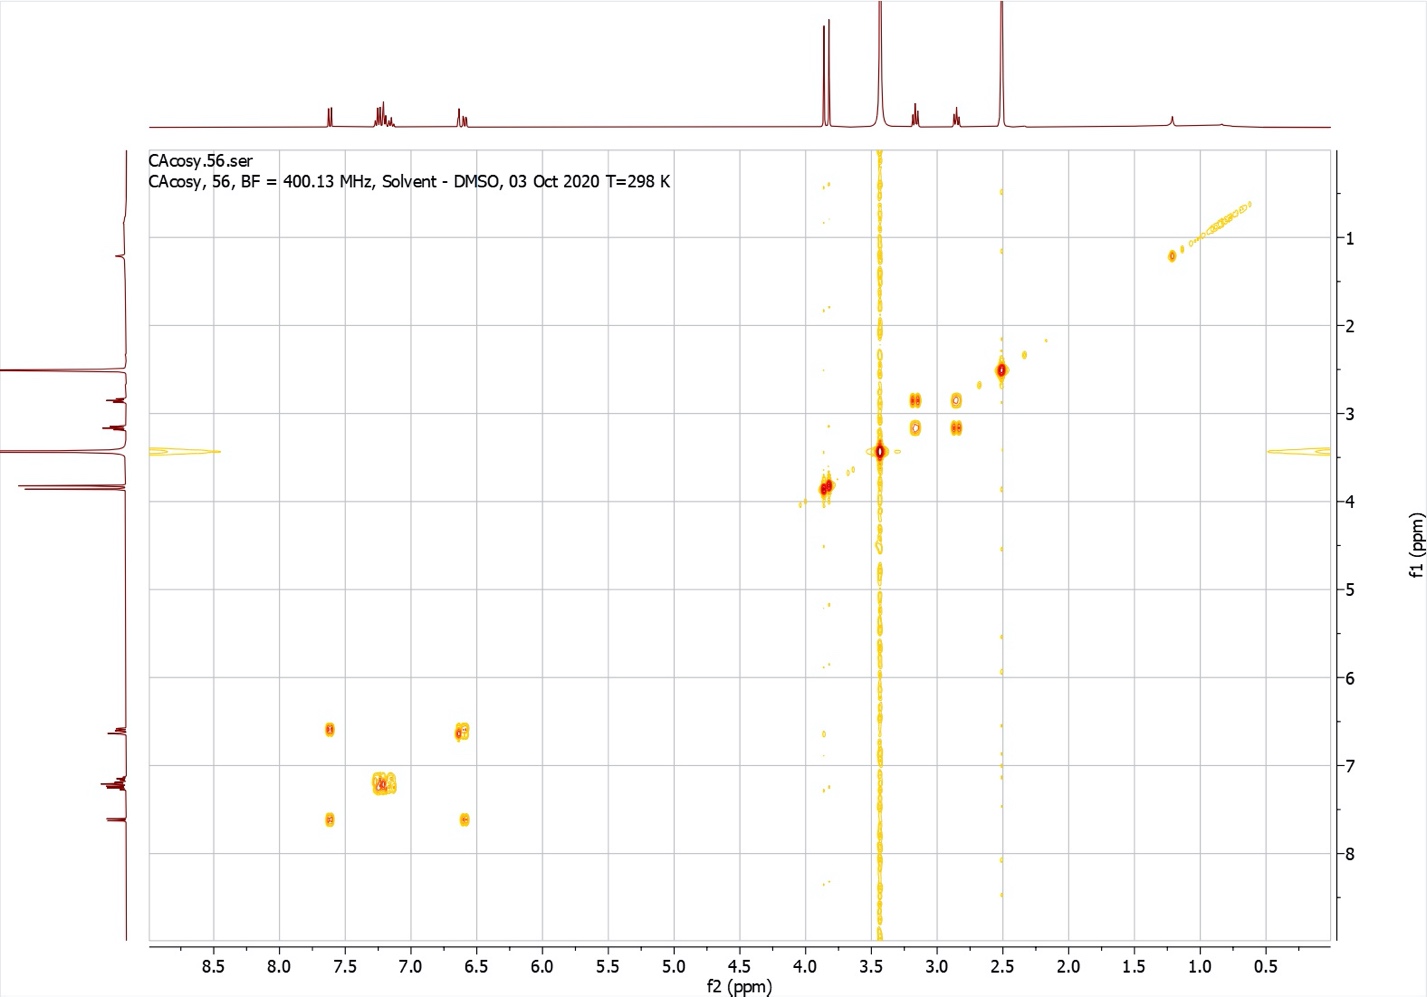


Figure S3. NOESY spectrum of compound **1** in DMSO-*d6* (400 MHz)


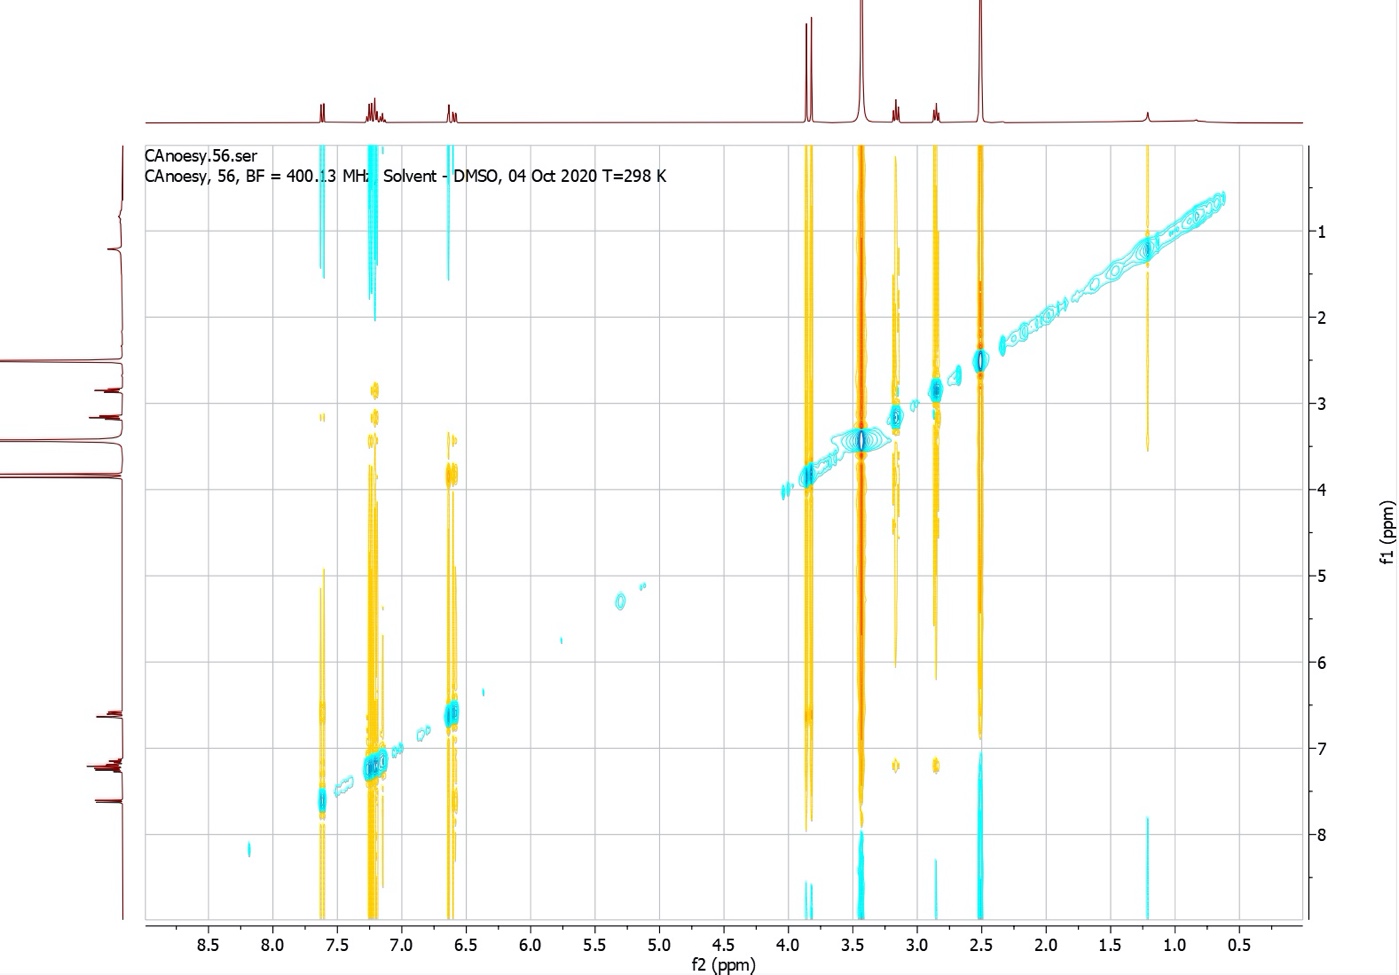


Figure S4. HMBC spectrum of compound **1** in DMSO-*d6* (400 MHz)


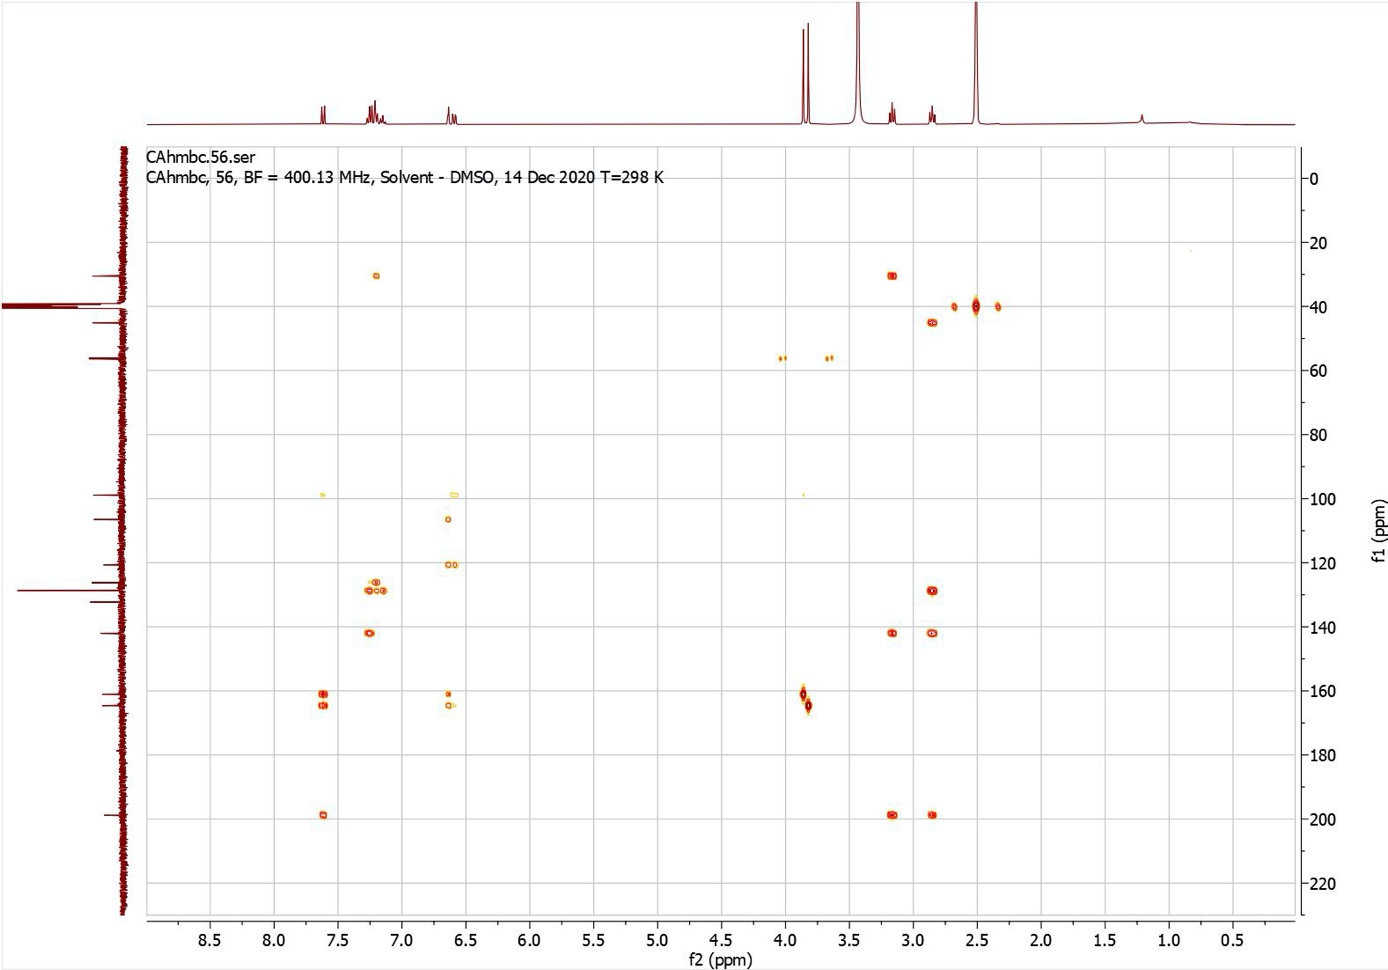


Figure S5. HSQC spectrum of compound **1** in DMSO-*d6* (400 MHz)


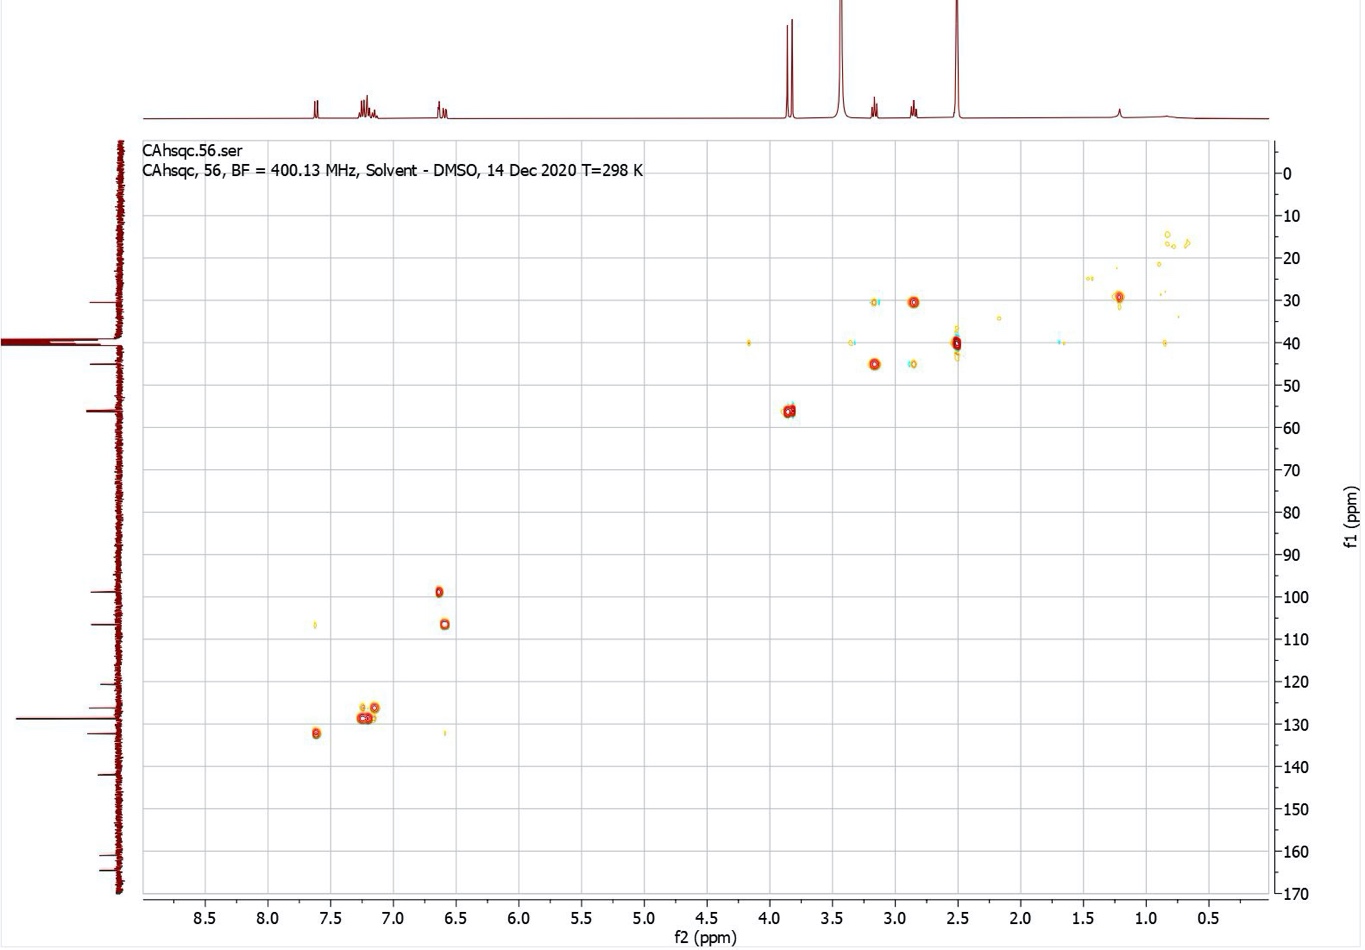


Figure S6. ABX spin system of ring A protons in the 1H NMR spectrum of compound **1**.


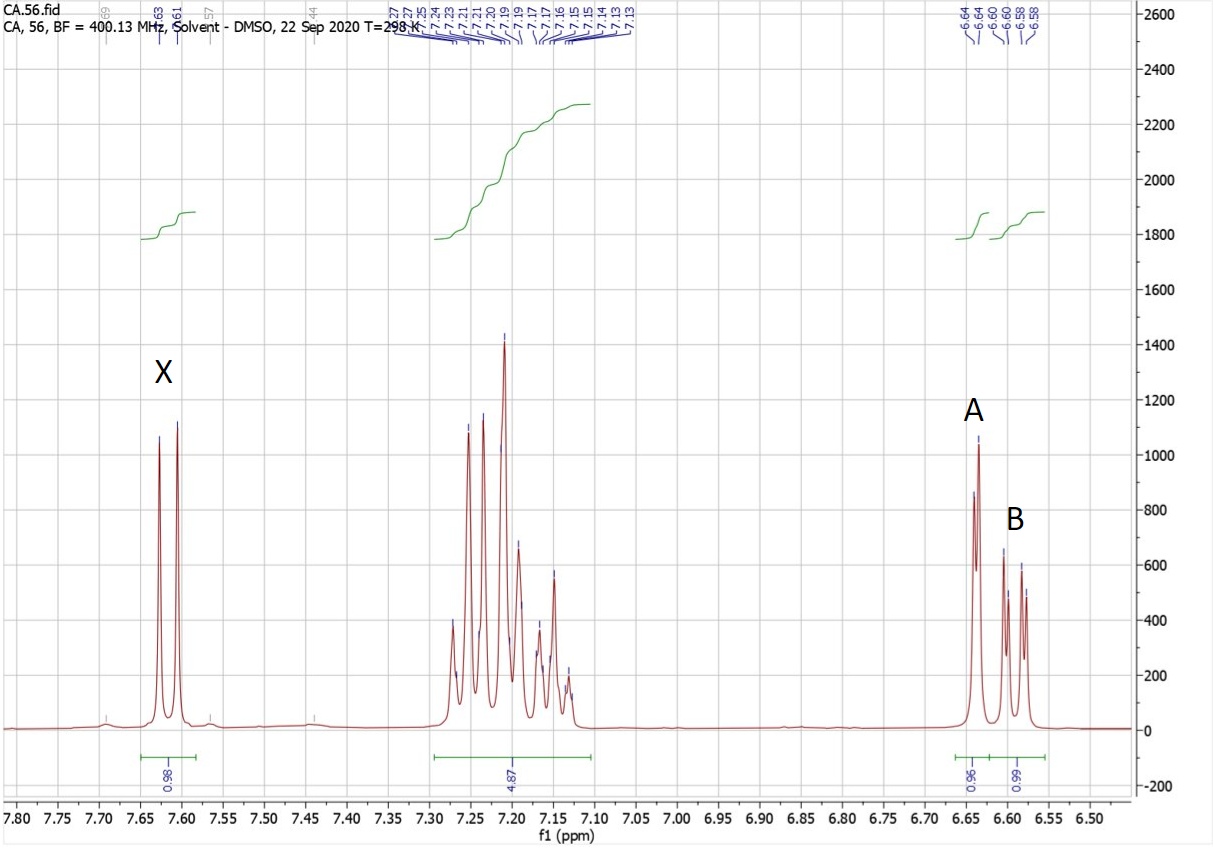


Figure S7. A2Х2 spin system of *α* and *β* protons in the 1H NMR spectrum of compound **1**.


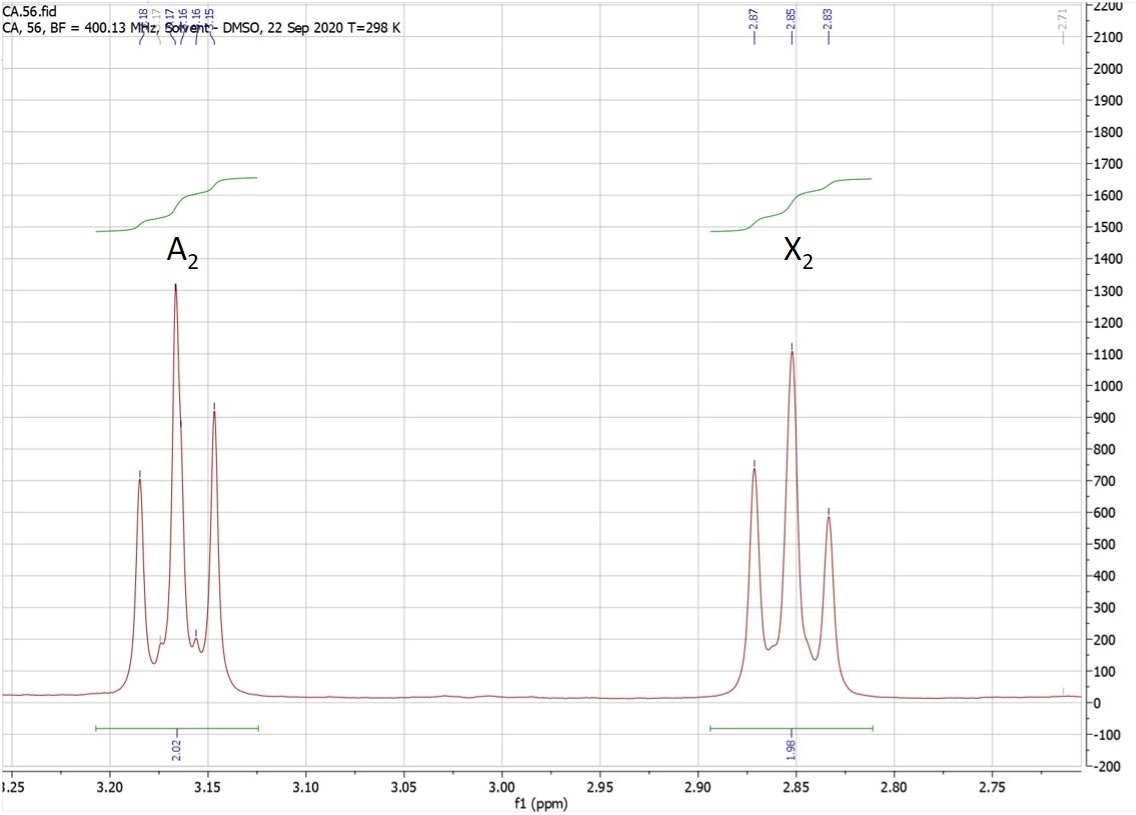


Figure S8. HR-ESI-MS spectrum of compound **1**

**
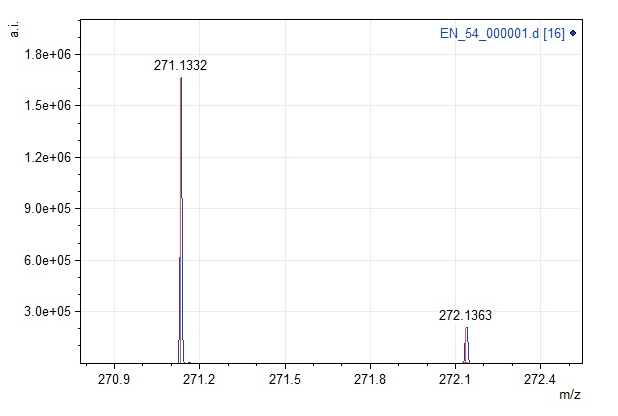
**

Figure S9. Key COSY, NOESY and HMBC correlations for **1**.


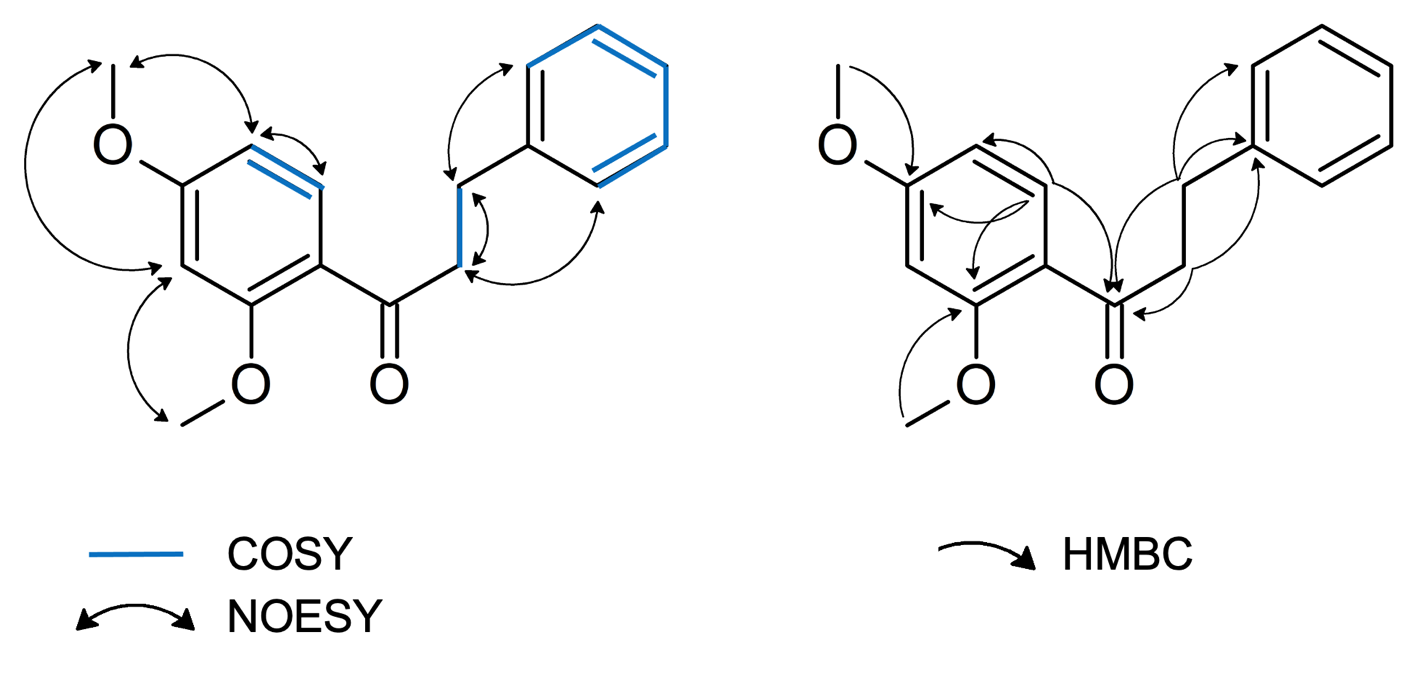


S10. 2',4'-dihydroxydihydrochalcone **(2)**

White crystalline solid; UV (EtOH) λmax nm: 276, 313. 1H NMR (400 MHz, DMSO-*d6*) *δ*: 6.37 (1H, *d*, *J=*2.3 Hz, H-3'), 6.42 (1H, *dd*, *J=*7.7, 2.3 Hz, H-5'), 7.77 (1H, *d*, *J=*7.7 Hz, H-6'), 7.24 (4H, *m*, H-2, 3, 5, 6), 7.16 (1H, *m*, H-4), 3.26 (2H, *t*, *J=*7.7 Hz, H-*α*), 2.91 (2H, *t*, *J=*7.7 Hz, H-*β*). HR-ESI-MS at *m/z* [M+H]+ 243.1021 (calc. 243.1021).

S11. 2'-hydroxy-4'-methoxydihydrochalcone **(3)**

White crystalline solid; UV (EtOH) λmax nm: 274, 314. 1H NMR (400 MHz, DMSO-*d6*) *δ*: 6.49 (1H, *d*, *J=*2.3 Hz, H-3'), 6.49 (1H, *dd*, *J=* 9.6, 2.3 Hz, H-5'), 7.87 (1H, *d*, *J=* 9.6 Hz, H-6'), 7.17 (1H, *m*, H-4), 7.26 (4H, *m*, H-2, 3, 5, 6), 3.32 (2H, *t*, *J=*7.7 Hz, H-*α*), 2.92 (2H, *t*, *J=*7.7 Hz, H-*β*), 3.79 (3H, *s*, OMe-2'), 12.52 (1H, *s*, OH-4'). HR-ESI-MS at *m/z* [M+H]+ 257.1177 (calc. 257.1178).

S12. 2'-hydroxy-4'-methoxychalcone **(4)**

White crystalline solid; UV (EtOH) λmax nm: 341. 1H NMR (400 MHz, DMSO-*d6*) *δ*: 6.36 (1H, *d*, *J=*2.1 Hz, H-3'), 6.44 (1H, *dd*, *J=*9.1, 2.1 Hz, H-5'), 7.91 (1H, *d*, *J=*9.1 Hz, H-6'), 7.36 (3H, *m*, H-3, 4, 5), 7.64 (2H, *m*, H-2,6), 7.76 (1H, *d*, *J=*15.5 Hz, H-*α*), 7.64 (1H, *m*, H-*β*), 3.79 (3H, *s*, OMe-2'), 13.32 (1H, *s*, OH-4'). HR-ESI-MS at *m/z* [M+H]+ 255.1020 (calc. 255.1021).

S13.1-(3,5-dihydroxy-4-methoxyphenyl)-2-(3-hydroxyphenyl)ethane **(5)**

Yellow crystalline solid; UV (EtOH) λmax nm: 272. 1H NMR (400 MHz, DMSO-*d6*) *δ*: 6.21 (2H, *s*, H-2,6), 6.64 (1H, *m*, H-2'), 6.60 (1H, *m*, H-4'), 7.02 (1H, *t*, *J=*8.5, 7.7 Hz, H-5'), 6.60 (1H, *m*, H-6'), 2.58 (2H, *m*, H-*α*), 2.66 (2H, *m*, H-*β*), 8.99 (2H, *s*, OH-3,5), 9.44 (1H, *s*, OH-3'), 3.62 (3H, *s*, OMe-4). 13C NMR (100 MHz, DMSO-*d6*) *δ*: 137.2 (1-C), 107.6 (C-2), 150.8 (C-3), 133.9 (C-4), 150.8 (C-5), 107.6 (C-6), 143.3 (C-1'), 115.6 (C-2'), 157.8 (C-3'), 119.1 (C-4'), 129.5 (C-5'), 119.4 (C-6'), 37.3 (C-*α*), 37.6 (C-*β*); HR-ESI-MS at *m/z* [M+H]+ 261.1126 (calc. 261.1127).

S14. 2,3,4,7-tetramethoxy-9,10-dihydrophenanthrene **(6)**

Yellow crystalline solid; UV (EtOH) λmax nm: 283. 1H NMR (400 MHz, DMSO-*d6*) *δ*: 6.76 (1H, *s*, H-1), 8.05 (1H, *d*, *J=*8.5 Hz, H-5), 6.80 (1H, *dd*, *J=*8.4, 2.7 Hz, H-6), 6.82 (1H, *brs*, H-8), 2.66 (2H, *m*, H-9), 2.66 (2H, *m*, H-10), 3.75 (3H, *s*, OMe-7), 3.80 (3H, *s*, OMe-2), 3.74 (3H, *s*, OMe-3), 3.65 (3H, *s*, OMe-4). 13C NMR (100 MHz, DMSO-*d6*) *δ*: 108.4 (C-1), 151.7 (C-2), 141.4 (C-3), 151.5 (C-4), 120.3 (C-4a), 125.2 (C-4b), 112.1 (C-5), 113.3 (C-6), 158.1 (C-7), 113.5 (C-8), 139.5 (C-8a), 29.8 (C-9), 30.0 (C-10), 134.1 (C-10a). HR-ESI-MS at *m/z* [M+H]+ 301.1439 (calc. 301.1440).

S15. 5-hydroxy-2,3,4-trimethoxy-9,10-dihydrophenanthrene **(7)**

Yellow crystalline solid; UV (EtOH) λmax nm: 275, 296. 1H NMR (400 MHz, DMSO-*d6*) *δ*: 6.89 (1H, *s*, H-1), 6.83 (1H, *brd*, *J=*8.6 Hz, H-6), 7.06 (1H, *dd*, *J=* 8.6, 7.7 Hz, H-7), 6.79 (1H*, brd*, *J=* 7.7 Hz, H-8), 2.58 (4H, *m*, H-9,10), 3.83 (3H, *s*, OMe-2), 3.67 (3H, *s*, OMe-3), 3.76 (3H, *s*, OMe-4), 8.88 (1H, *s*, OH-5). 13C NMR (100 MHz, DMSO-*d6*) *δ*: 108.8 (C-1), 152.4 (C-2), 149.8 (C-3), 140.7 (C-4), 120.5 (C-4a), 118.9 (C-4b), 153.8 (C-5), 117.0 (C-6), 128.1 (C-7), 120.3 (C-8), 140.9 (C-8a), 30.8 (C-9,10), 136.5 (C-10a), 56.3 (OMe-2), 61.0 (OMe-3), 62.2 (OMe-4). HR-ESI-MS at *m/z* [M+H]+ 283.1283 (calc. 287.1283).

S16. 5,7-dihydroxy-6,8-dimethylflavanone **(8)**

Pale yellow crystalline solid; UV (EtOH) λmax nm: 296, 347. 1H NMR (400 MHz, DMSO-*d6*) *δ*: 5.55 (1H, *dd*, *J=*12.3, 3.2 Hz, H-2), 3.16 (1H, *dd*, *J=*17.1*,* 12.3, H-3a), 2.83 (1H, *dd*, *J=*17.1, 3.2, H-3b), 7.51 (2H, *m*, H-2',6'), 7.42 (2H, *m*, H-3',5'), 7.36 (1H, *m*, H-4'), 1.97 (3H, *s*, 6-CH3), 1.96 (3H, *s*, 8-CH3), 12.33 (1H, *s*, 5-OH), 9.88 (1H, *s*, 7-OH). HR-ESI-MS at *m/z* [M+H]+  285.1124 (calc. 285.1127).

S17. Parameters for 1H, COSY, NOESY, HMBC and HSQC experiments.

**1H**

Pulse program: zg30

Time domain size: 64k

Spectral width: 10000 Hz

90 degree pulse width 1H: 8.5 µsec

Power level for pulse 1H: 23.7 W

Relaxation delay: 1 sec

Acquisition time: 3.27 sec

**COSY**

Pulse program: cosygpppqf

Time domain size: 2048(F2) 256(F1)

Spectral width: 4000 Hz

90 degree pulse width 1H: 8.5 µsec

Power level for pulse 1H: 23.7 W

Relaxation delay: 2 sec

Acquisition time: 0.256 sec

**NOESY**

Pulse program: noesygpphpp

Time domain size: 2048(F2) 128(F1)

Spectral width: 4000 Hz

90 degree pulse width 1H: 8.5 µsec

Power level for pulse 1H: 23.7 W

Relaxation delay: 1.92 sec

Acquisition time: 0.256 sec

Mixing time 0.7 sec

**HMBC**

Pulse program: hmbcgpl2ndqf

Time domain size: 2048(F2) 256(F1)

Spectral width: 4000 Hz (F2)

Spectral width: 24149 Hz (F1)

90 degree pulse width 1H: 8.5 µsec

Power level for pulse 1H: 23.7 W

90 degree pulse width 13C: 9.10 µsec

Power level for pulse 13C: 94 W

Delay for evolution of long range coupling: 0.0625 sec

Relaxation delay: 1.5 sec

Acquisition time: 0.256 sec

**HSQC**

Pulse program: hsqcetgpsi2

Time domain size: 1024(F2) 256(F1)

Spectral width: 4000 Hz (F2)

Spectral width: 17910 Hz (F1)

90 degree pulse width 1H: 8.5 µsec

Power level for pulse 1H: 23.7 W

90 degree pulse width 13C: 9.10 µsec

Power level for pulse 13C: 94 W

Delay for evolution CH coupling (1/4JCH): 0.00172 sec

Relaxation delay: 1.45 sec

Acquisition time: 0.128 sec

S18. Scan of *Empetrum nigrum* L. voucher specimen
